# Supplementary material for: Synthesis and crosslinking study of isomeric poly(thioether ether imide)s containing pendant nitrile and terminal phthalonitrile groups
Source: Royal Society of Chemistry journal article supplement (doi:10.1039/c6py01705c), 2016-01-01
Supplement: c6py01705c1.pdf [file c6py01705c1.pdf]

## Supplementary information

### Synthesis and crosslinking study of isomeric poly(thioether ether imide)s containing pendant nitrile and terminal phthalonitrile groups

Fig.S1:  $^1\text{H}$  NMR spectrum of model compound **1** in  $\text{CDCl}_3$

Fig.S2. GPC curves of PI (c, d) and PN-PI (c, d)

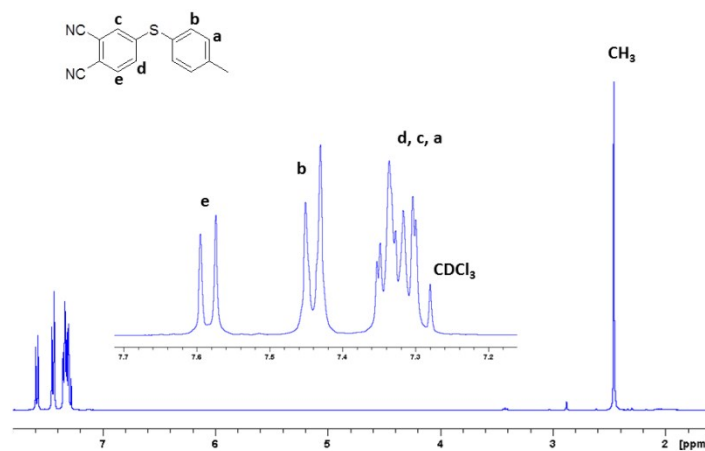

**Figure S1.**  $^1\text{H}$  NMR spectrum of model compound **1** in  $\text{CDCl}_3$

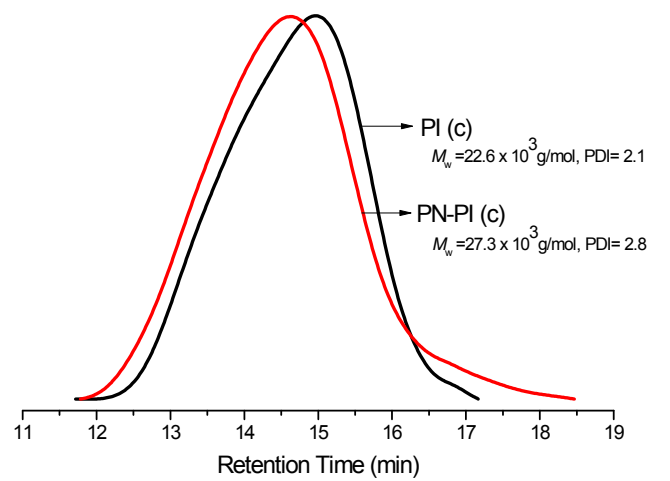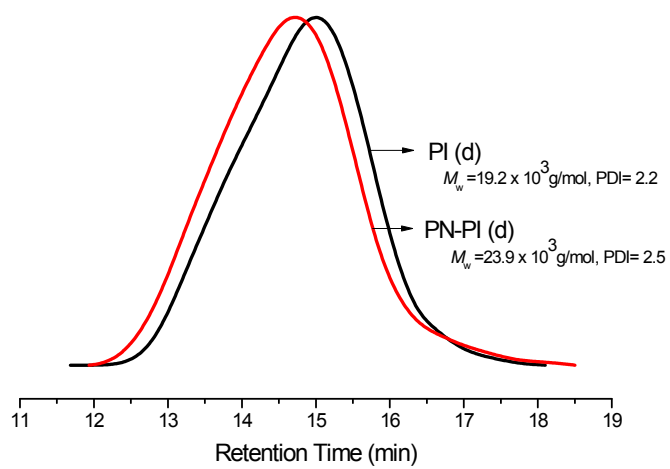

**Fig. S2. GPC curves of PI (c, d) and PN-PI (c, d)**
